# Supplementary material
Source: PubMed Central journal article supplement (PMC7586288)
Supplement: am0c09075_si_001.pdf [file am0c09075_si_001.pdf]

# Supporting Information

## Targeting and Inhibiting *Plasmodium falciparum*

## Using Ultra-small Gold Nanoparticles

*Silvia Varela-Aramburu<sup>†,‡</sup>, Chandradhish Ghosh<sup>†</sup>, Felix Goerdeler<sup>†,‡</sup>, Patricia Priegue<sup>†,‡</sup>,  
Oren Moscovitz<sup>†,‡</sup> and Peter H. Seeberger<sup>\*,†,‡</sup>*

<sup>†</sup>Department of Biomolecular Systems, Max Planck Institute of Colloids and Interfaces, Am  
Mühlenberg 1, 14476 Potsdam, Germany

<sup>‡</sup>Department of Biology, Chemistry, Pharmacy, Freie Universität Berlin, Arnimallee 22, 14195  
Berlin, Germany

\*Corresponding author: [Peter.Seeberger@mpikg.mpg.de](mailto:Peter.Seeberger@mpikg.mpg.de)

## Supporting images

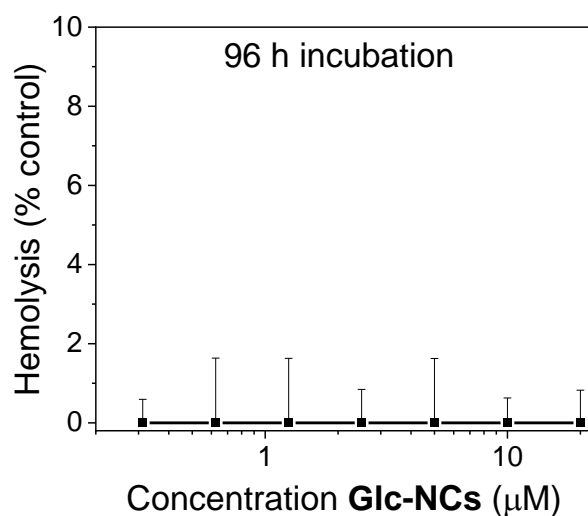

**Figure S1.** Hemolysis assay of **Glc-NCs** (0.3 to 20  $\mu\text{M}$ ) incubated with RBCs for 96 h showed no hemolytic effect.

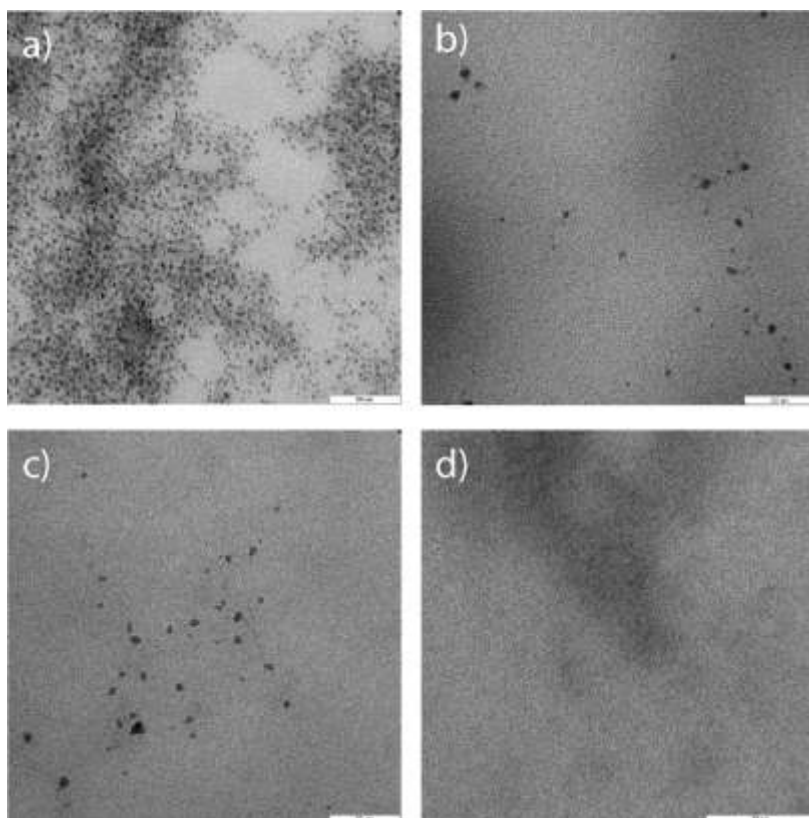

**Figure S2.** TEM imaging of a) **Glc-NCs** in water; b) **Glc-NCs** and c) **Cipro@Glc-NCs** in RPMI medium containing FBS and d) RPMI medium containing FBS as control. Scale bars = 50 nm.

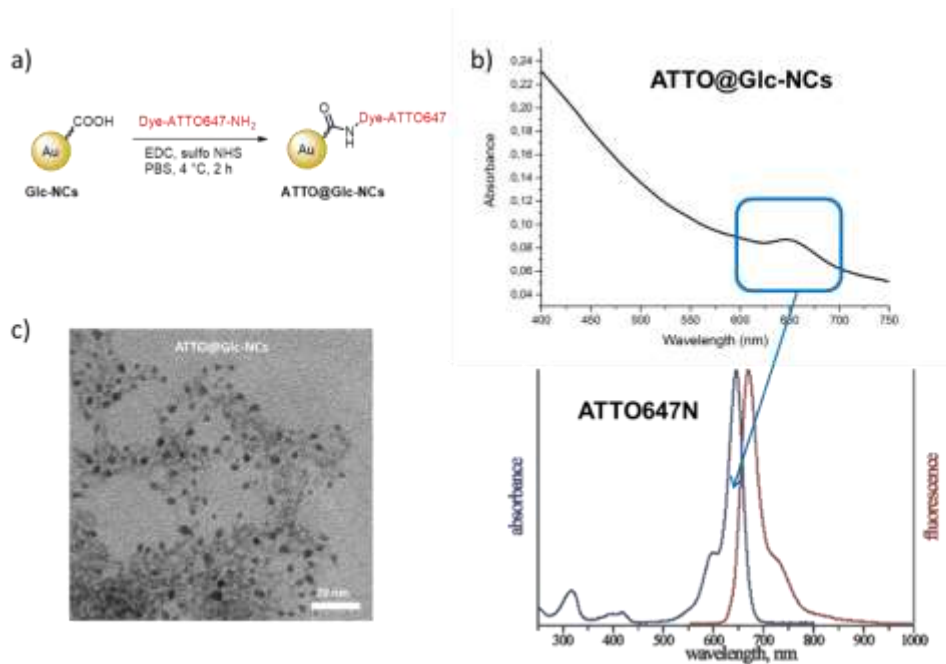

**Figure S3.** a) Synthesis of fluorescently tagged **ATTO@Glc-NCs** through an amidation reaction; b) UV showed reaction completion as an additional band at 650 nm appeared after purification; c) TEM image of **ATTO@Glc-NCs** (scale bar: 20 nm).

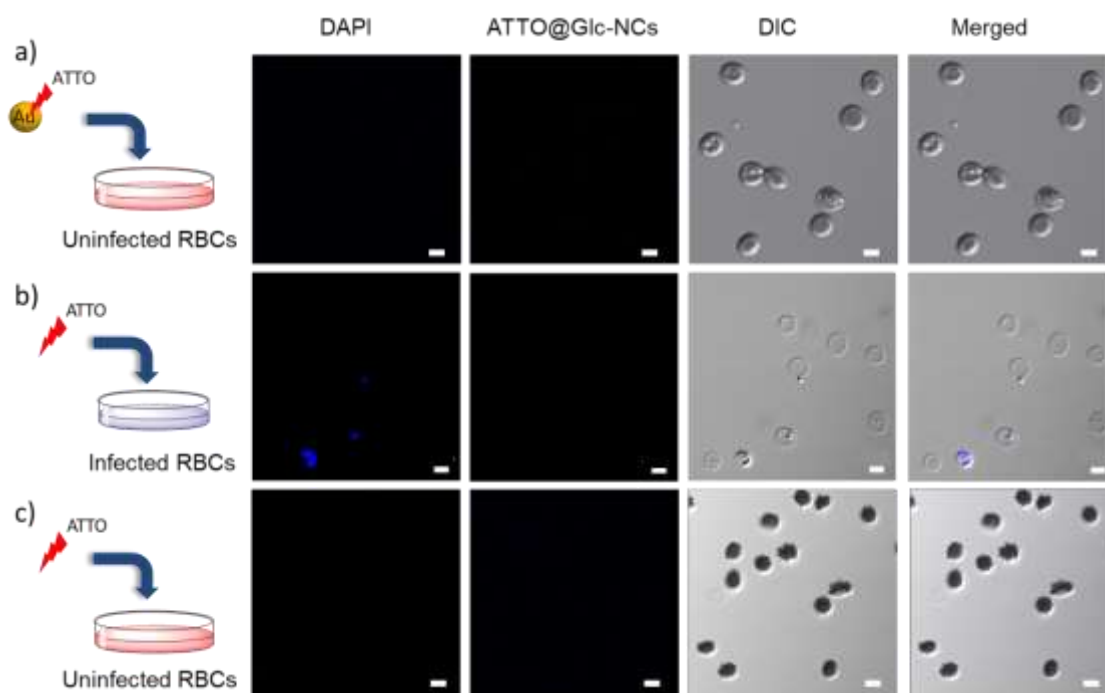

**Figure S4.** CLSM images of a) **ATTO@Glc-NCs** incubated with uninfected RBCs, b) **ATTO647N** free dye incubated with infected RBCs and, c) **ATTO647N** free dye incubated with uninfected RBCs; (red channel = **ATTO647N**; blue channel = **DAPI**; scale bar 5  $\mu$ m).

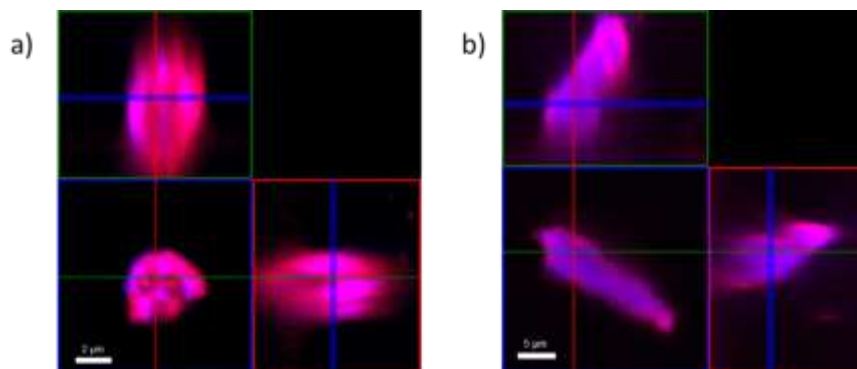

**Figure S5.** Z-Stack confocal imaging of ATTO@Glc-NCs a) incubated with schizonts and b) with gametocytes (stage V).

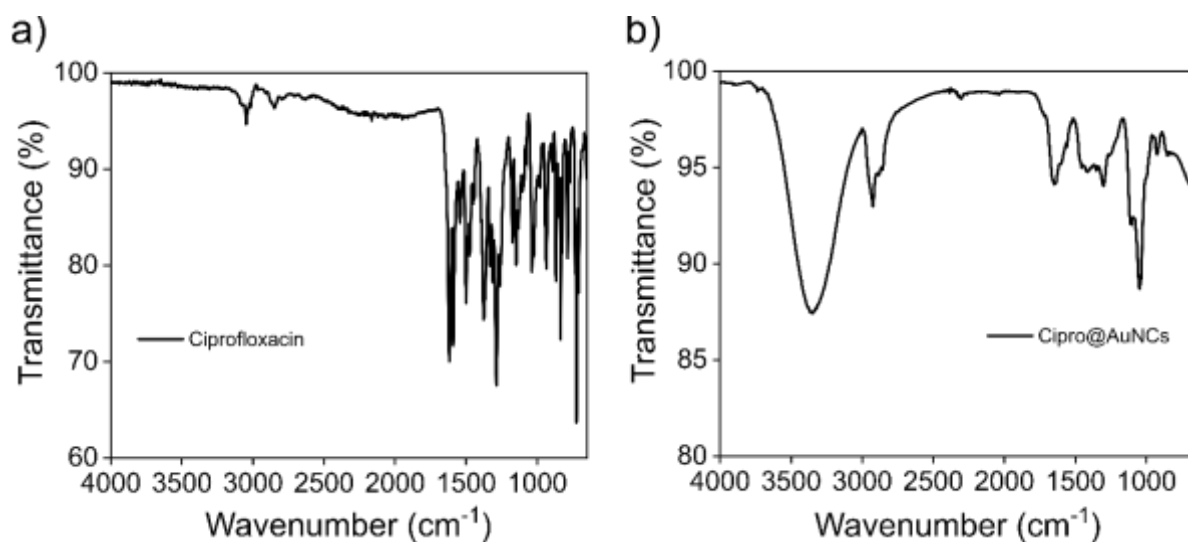

**Figure S6.** FT-IR spectra of a) ciprofloxacin alone and b) **Cipro@AuNCs**. The band at 1650  $\text{cm}^{-1}$  is typical for a tertiary amide bond showing the successful loading of ciprofloxacin to **Glc-NCs**.

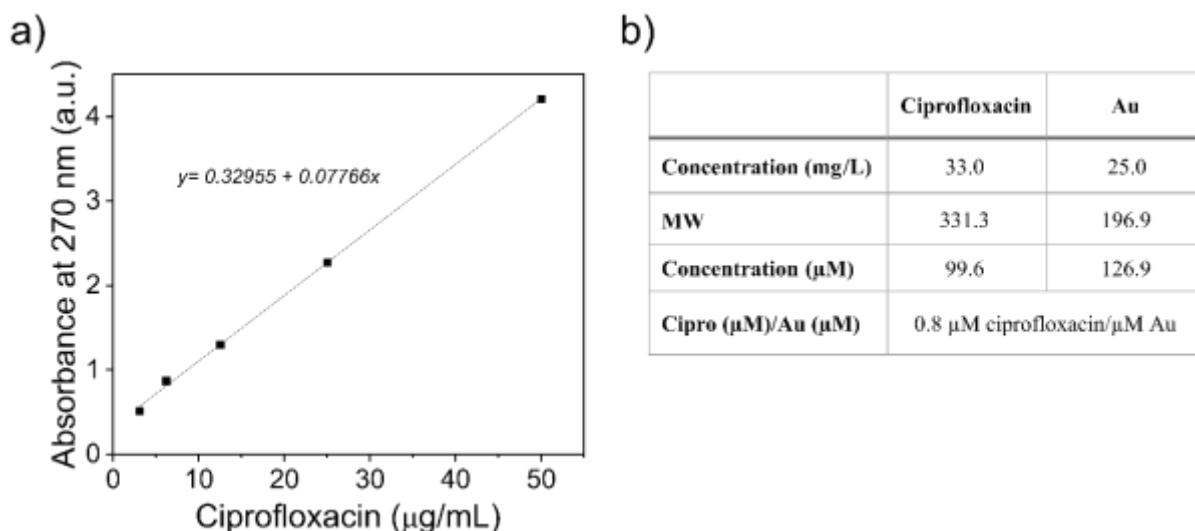

**Figure S7.** a) Calibration curve made from different concentrations of ciprofloxacin at 277 nm for the calculation of drug loaded on **Cipro@Glc-NCs**; b) Calculations for the loading of ciprofloxacin (calculated by UV-Vis spectroscopy) per concentration of gold (calculated by ICP-AES).

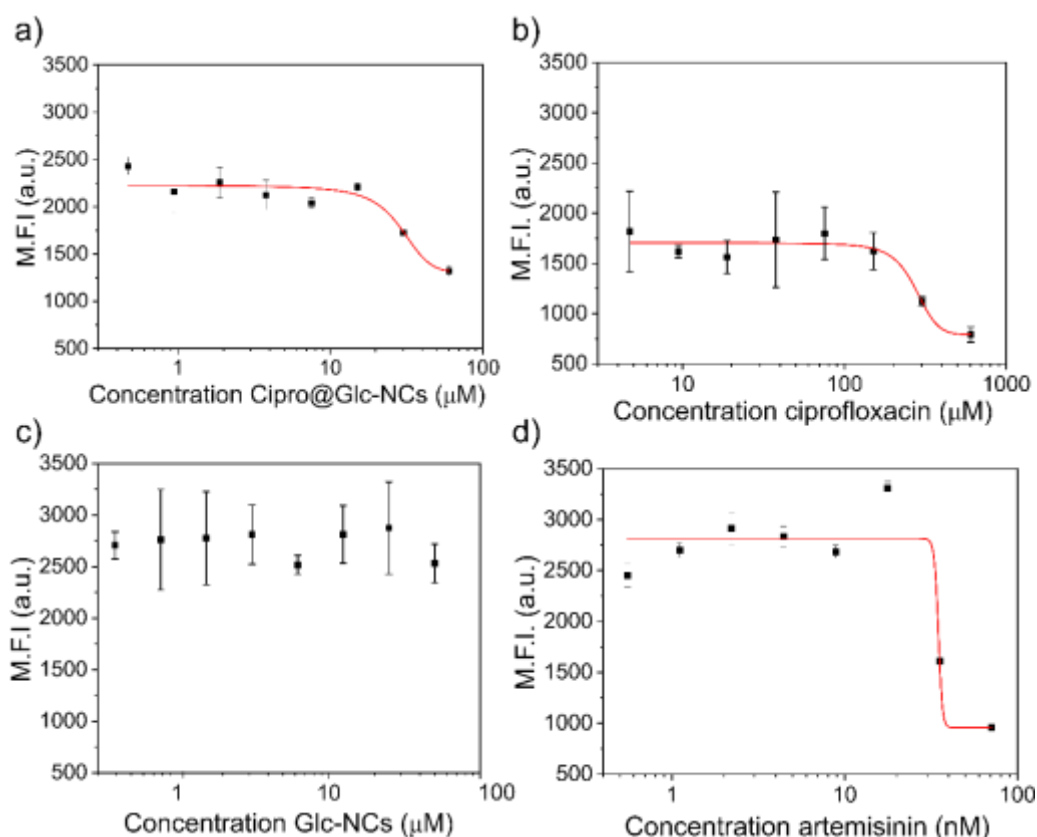

**Figure S8.** Inhibition curves of *P. falciparum* for a) **Cipro@Glc-NCs**; b) ciprofloxacin; c) **Glc-NCs** (could not be fitted); d) artemisinin. MFI = mean fluorescence intensity, error bars represent standard error of the mean.

**Table S1.** P values calculated from ANOVA with Tukey post-hoc test.

| <b>P values</b>      | <b>Ciprofloxacin</b> | <b>Cipro@Glc-NCs</b> | <b>Artemisinin</b> |
|----------------------|----------------------|----------------------|--------------------|
| <b>Ciprofloxacin</b> |                      |                      |                    |
| <b>Cipro@Glc-NCs</b> | 0.05                 |                      |                    |
| <b>Artemisinin</b>   | 0.02                 | 0.79                 |                    |
